# Supplementary material for: A Data-Driven Approach to Stormwater Quality Analysis in Two Urban Catchments
Source: MDPI journal article supplement (doi:10.3390/su14052888), 2022-03-02
Supplement: s1 [file s1]

## Supplementary

The following data has been compiled from the StormTac Database, version v.2021-09-02, by extraction of data for the four selected substances TP, Cu, Zn and TSS as well as the land uses that exist in the two case studies. A CV-value <0.5 indicates a low uncertainty (green), a CV between 0.50-1.25 (yellow) an average uncertainty and a CV>1.25 a high uncertainty (red), according to Burton G.A. and Pitt R.E. 2002. Stormwater Effects Handbook. A toolbox for watershed managers, scientists, and engineers. Lewis Publishers, Boca Raton, Florida.

**Table S1.** Stormwater concentrations (TP, Cu and Zn in µg/L, TSS in mg/L) and statistics for different land uses considered in the case studies.

|                              | TP   | Cu   | Zn   | TSS  |
|------------------------------|------|------|------|------|
| <b>Residential</b>           |      |      |      |      |
| Typical value                | 230  | 20   | 80   | 45   |
| Coefficient of variation, CV | 0.58 | 1.2  | 0.76 | 1.1  |
| Number of values             | 93   | 94   | 96   | 98   |
| Median value                 | 340  | 13   | 73   | 71   |
| Mean value                   | 390  | 20   | 97   | 120  |
| Standard deviation           | 230  | 25   | 74   | 130  |
| Standard error               | 23   | 2.6  | 7.5  | 13   |
| Relative standard error (%)  | 6.0  | 13   | 7.8  | 11   |
| <b>Downtown area</b>         |      |      |      |      |
| Typical value                | 290  | 32   | 160  | 100  |
| Coefficient of variation, CV | 0.58 | 1.1  | 0.69 | 1.3  |
| Number of values             | 47   | 49   | 48   | 56   |
| Median value                 | 320  | 20   | 160  | 95   |
| Mean value                   | 370  | 32   | 210  | 160  |
| Standard deviation           | 220  | 35   | 150  | 200  |
| Standard error               | 32   | 5.0  | 21   | 27   |
| Relative standard error (%)  | 8.5  | 16   | 9.9  | 17   |
| <b>Industrial</b>            |      |      |      |      |
| Typical value                | 310  | 42   | 240  | 100  |
| Coefficient of variation, CV | 0.70 | 1.0  | 0.72 | 1.2  |
| Number of values             | 58   | 59   | 60   | 60   |
| Median value                 | 310  | 27   | 240  | 100  |
| Mean value                   | 410  | 42   | 300  | 170  |
| Standard deviation           | 290  | 44   | 220  | 190  |
| Standard error               | 37   | 5.7  | 28   | 25   |
| Relative standard error (%)  | 9.1  | 13   | 9.3  | 15   |
| <b>Freeways</b>              |      |      |      |      |
| Typical value (ADT 13 000)   | 140  | 28   | 210  | 77   |
| Typical value (ADT 7 000)    | 110  | 18   | 150  | 67   |
| Coefficient of variation, CV | 0.78 | 0.85 | 1.1  | 0.98 |
| Number of values             | 38   | 59   | 62   | 57   |
| Median value                 | 270  | 41   | 210  | 100  |
| Mean value                   | 310  | 53   | 300  | 130  |
| Standard deviation           | 240  | 45   | 340  | 130  |
| Standard error               | 39   | 5.8  | 43   | 17   |
| Relative standard error (%)  | 13   | 11   | 14   | 13   |
| <b>Agricultural property</b> |      |      |      |      |
| Typical value                | 250  | 11   | 70   | 100  |
| Coefficient of variation, CV | 0.84 | 0.92 | 0.66 | 1.4  |
| Number of values             | 16   | 4    | 4    | 11   |
| Median value                 | 250  | 22   | 160  | 55   |

|                              |      |       |      |      |
|------------------------------|------|-------|------|------|
| Mean value                   | 330  | 38    | 170  | 150  |
| Standard deviation           | 280  | 35    | 110  | 210  |
| Standard error               | 69   | 17    | 55   | 63   |
| Relative standard error (%)  | 21   | 46    | 33   | 43   |
| <b>Forest</b>                |      |       |      |      |
| Typical value                | 17   | 9.0   | 30   | 40   |
| Coefficient of variation, CV | 1.4  | 0.29  | 0.99 | 0.54 |
| Number of values             | 22   | 6     | 6    | 9    |
| Median value                 | 24   | 9.0   | 30   | 40   |
| Mean value                   | 56   | 8.0   | 69   | 46   |
| Standard deviation           | 78   | 2.3   | 68   | 25   |
| Standard error               | 17   | 0.94  | 28   | 8.3  |
| Relative standard error (%)  | 30   | 12    | 40   | 18   |
| <b>Multi-family area</b>     |      |       |      |      |
| Typical value                | 260  | 30    | 100  | 100  |
| Coefficient of variation, CV | 0.37 | 1.2   | 0.76 | 1.2  |
| Number of values             | 18   | 13    | 13   | 13   |
| Median value                 | 310  | 80    | 140  | 130  |
| Mean value                   | 310  | 140   | 170  | 160  |
| Standard deviation           | 110  | 170   | 130  | 190  |
| Standard error               | 27   | 46    | 35   | 53   |
| Relative standard error (%)  | 8.8  | 33    | 21   | 33   |
| <b>Park grounds</b>          |      |       |      |      |
| Typical value                | 200  | 11    | 60   | 24   |
| Coefficient of variation, CV | 0.75 | 0.048 | 0.33 | 0.73 |
| Number of values             | 6    | 2     | 2    | 3    |
| Median value                 | 90   | 11    | 60   | 12   |
| Mean value                   | 120  | 11    | 60   | 24   |
| Standard deviation           | 92   | 0.50  | 20   | 17   |
| Standard error               | 38   | 0.35  | 14   | 10   |
| Relative standard error (%)  | 30   | 3.4   | 24   | 42   |
| <b>Parking</b>               |      |       |      |      |
| Typical value                | 180  | 40    | 140  | 140  |
| Coefficient of variation, CV | 1.2  | 1.6   | 0.71 | 1.5  |
| Number of values             | 25   | 27    | 27   | 18   |
| Median value                 | 180  | 30    | 210  | 150  |
| Mean value                   | 400  | 57    | 250  | 260  |
| Standard deviation           | 500  | 89    | 180  | 380  |
| Standard error               | 100  | 17    | 34   | 89   |
| Relative standard error (%)  | 25   | 30    | 14   | 35   |
| <b>Terraced house area</b>   |      |       |      |      |
| Typical value                | 250  | 20    | 85   | 5    |
| Coefficient of variation, CV | 0.65 | 0.85  | 0.43 | 0.33 |
| Number of values             | 7    | 6     | 5    | 7    |
| Median value                 | 420  | 11    | 57   | 59   |
| Mean value                   | 390  | 21    | 64   | 58   |
| Standard deviation           | 250  | 18    | 27   | 19   |
| Standard error               | 96   | 7.2   | 12   | 7.2  |
| Relative standard error (%)  | 25   | 35    | 19   | 12   |
| <b>Meadows</b>               |      |       |      |      |
| Typical value                | 250  | 11    | 30   | 90   |
| Coefficient of variation, CV | 0.75 | 0.57  | 0.27 | 0.97 |
| Number of values             | 5    | 3     | 3    | 4    |
| Median value                 | 310  | 10    | 30   | 120  |
| Mean value                   | 350  | 17    | 30   | 210  |

|                             |     |     |     |     |
|-----------------------------|-----|-----|-----|-----|
| Standard deviation          | 270 | 9.4 | 8.2 | 200 |
| Standard error              | 120 | 5.4 | 4.7 | 100 |
| Relative standard error (%) | 34  | 33  | 16  | 48  |

**Table S2.** Baseflow concentrations (TP, Cu and Zn in µg/L, TSS in mg/L) and statistics for different land uses considered in the case studies. For the land uses where no statistics are given, there is no data, and the typical values are thus based on data from similar land uses. For land uses where there was only one case study, this data was presented, but no statistics.

|                              | TP    | Cu   | Zn   | TSS   |
|------------------------------|-------|------|------|-------|
| <b>Residential</b>           |       |      |      |       |
| Typical value                | 58    | 5.5  | 27   | 10    |
| Coefficient of variation, CV | 0.83  | 0.53 | 0.46 | 0.63  |
| Number of values             | 8     | 7    | 7    | 6     |
| Median value                 | 220   | 9.1  | 37   | 14    |
| Mean value                   | 300   | 11   | 38   | 16    |
| Standard deviation           | 240   | 5.8  | 17   | 10    |
| Standard error               | 86    | 2.2  | 6.5  | 4.1   |
| Relative standard error (%)  | 29    | 20   | 17   | 26    |
| <b>Downtown area</b>         |       |      |      |       |
| Typical value                | 81    | 8    | 47   | 13    |
| Coefficient of variation, CV | 0.67  |      |      | 0.053 |
| Number of values             | 2     | 1    | 1    | 2     |
| Median value                 | 1 600 |      |      | 12    |
| Mean value                   | 1 600 |      |      | 12    |
| Standard deviation           | 1 000 |      |      | 0.66  |
| Standard error               | 740   |      |      | 0.46  |
| Relative standard error (%)  | 47    |      |      | 3.8   |
| <b>Industrial</b>            |       |      |      |       |
| Typical value                | 87    | 12   | 90   | 15    |
| Coefficient of variation, CV | 1.0   | 0.60 | 0.61 | 0.78  |
| Number of values             | 5     | 4    | 4    | 3     |
| Median value                 | 160   | 27   | 100  | 15    |
| Mean value                   | 260   | 27   | 100  | 22    |
| Standard deviation           | 260   | 16   | 63   | 17    |
| Standard error               | 120   | 8    | 31   | 9.9   |
| Relative standard error (%)  | 45    | 30   | 30   | 45    |
| <b>Freeways</b>              |       |      |      |       |
| Typical value                | 52    | 13   | 55   | 25    |
| Salt Lake City (1999)*       | 350   | 8    | 3    | 9.6   |
| <b>Agricultural property</b> |       |      |      |       |
| Typical value                | 39    | 14   | 20   | 19    |
| Coefficient of variation, CV | 0.54  |      |      |       |
| Number of values             | 2     |      |      | 1     |
| Median value                 | 85    |      |      |       |
| Mean value                   | 85    |      |      |       |
| Standard deviation           | 46    |      |      |       |
| Standard error               | 32    |      |      |       |
| Relative standard error (%)  | 38    |      |      |       |
| <b>Forest</b>                |       |      |      |       |
| Typical value                | 15    | 3.5  | 10   | 1.5   |
| Coefficient of variation, CV | 0.56  |      |      |       |
| Number of values             | 2     | 1    | 1    | 1     |
| Median value                 | 18    |      |      |       |

|                             |     |     |     |     |
|-----------------------------|-----|-----|-----|-----|
| Mean value                  | 18  |     |     |     |
| Standard deviation          | 10  |     |     |     |
| Standard error              | 7.1 |     |     |     |
| Relative standard error (%) | 39  |     |     |     |
| <b>Multi-family area</b>    |     |     |     |     |
| Typical value               | 87  | 8.3 | 33  | 17  |
| <b>Park grounds</b>         |     |     |     |     |
| Typical value               | 35  | 4.1 | 8.4 | 12  |
| <b>Parking</b>              |     |     |     |     |
| Typical value               | 29  | 11  | 47  | 35  |
| <b>Terraced house area</b>  |     |     |     |     |
| Typical value               | 73  | 6.9 | 28  | 11  |
| Myhrman (2020)**            | 19  | 5.9 | 17  | 81  |
| <b>Meadows</b>              |     |     |     |     |
| Typical value               | 30  | 4.5 | 20  | 2.0 |

\*) Salt Lake City. 1999. Storm water management plan. Stormwater NPDES Permit. 1999 Annual report.

Forest Dale Base Flow Samples 1995-1998.

\*\*) Myhrman G. 2020. Estimated concentrations compared to measured concentration from flow proportional sampling. Mälarenergi. v. 2020-09-15. (In Swedish).

**Table S3.** Reduction efficiencies (%) and statistics of different facilities used in the case study.

|                             | TP   | Cu  | Zn  | TSS |
|-----------------------------|------|-----|-----|-----|
| <b>Wet pond</b>             |      |     |     |     |
| Reduction efficiencies (%)  | 55   | 60  | 60  | 80  |
| Number of values            | 77   | 60  | 68  | 51  |
| Median value                | 53   | 53  | 63  | 79  |
| Mean value                  | 35   | 46  | 54  | 72  |
| Standard deviation          | 100  | 43  | 37  | 21  |
| Standard error              | 11   | 5.5 | 4.5 | 3.0 |
| Relative standard error (%) | 33   | 12  | 8.3 | 4.2 |
| <b>Bioretention filter</b>  |      |     |     |     |
| Reduction efficiencies (%)  | 65   | 65  | 85  | 80  |
| Number of values            | 77   | 41  | 44  | 32  |
| Median value                | 37   | 48  | 79  | 76  |
| Mean value                  | -21  | 36  | 72  | 68  |
| Standard deviation          | 200  | 61  | 25  | 47  |
| Standard error              | 23   | 9.6 | 3.8 | 8.3 |
| Relative standard error (%) | -110 | 27  | 5.2 | 12  |

**Table S4.** Rain depth (mm) and passed water volume (m<sup>3</sup>) from Ladbrodammen per sampling period during 2008-05-08 to 2008-05-20. Data from Alm, H.; Banach, A.; Larm, T. The Occurrence and Reduction of Priority Substances, Heavy Metals and Other Substances in Storm Water; Swedish Water, report No. 2010-06; 2010. (In Swedish)

| Start sampling | End sampling | Passed volume [m <sup>3</sup> ] | Rain depth [mm] |
|----------------|--------------|---------------------------------|-----------------|
| 08.05.2008     | 22.05.2008   | 4800                            | 18.2            |
| 23.05.2008     | 06.05.2008   | 400                             | 0               |
| 06.06.2008     | 19.06.2008   | 7600                            | 11.9            |
| 20.06.2008     | 03.07.2008   | 5800                            | 33.5            |
| 04.07.2008     | 17.07.2008   | 3400                            | 23.5            |
| 18.07.2008     | 31.07.2008   | 600                             | 3.6             |
| 01.08.2008     | 28.08.2008   | 30900                           | 153.1           |
| 29.08.2008     | 10.09.2008   | 7300                            | 22.7            |
| 11.09.2008     | 24.09.2008   | 900                             | 0               |
| 25.09.2008     | 22.10.2008   | 13300                           | 46.8            |
| 23.10.2008     | 06.11.2008   | 8600                            | 25.7            |
| 07.11.2008     | 19.11.2008   | 1100                            | 51.9            |
| 20.11.2008     | 16.12.2008   | 13300                           | 68.2            |
| 18.12.2008     | 21.01.2009   | 98700                           | 19.8            |
| 22.01.2009     | 11.02.2009   | 25700                           | 24.9            |
| 12.02.2009     | 12.03.2009   | 20300                           | 32              |
| 13.03.2009     | 08.04.2009   | 13000                           | 16.1            |
| 09.04.2009     | 06.05.2009   | 5400                            | 6.7             |

**Table S5.** Rain depth (mm) from Ladbrodammen during the sampling period 2009-05-07 to 2010-08-31. 2 samples/month.

|           | Rain depth [mm] |
|-----------|-----------------|
| May 2009  | 20.7            |
| June 2009 | 101.4           |
| July 2009 | 70              |
| Aug. 2009 | 59.4            |
| Sep. 2009 | 42              |
| Oct. 2009 | 67.1            |
| Nov. 2009 | 58.9            |
| Dec. 2009 | 42.1            |
| Jan. 2010 | 25.2            |
| Feb. 2010 | 38.3            |
| Mar. 2010 | 31.2            |
| Apr. 2010 | 26.3            |
| May 2010  | 45              |
| June 2010 | 43.2            |
| July 2010 | 66.3            |
| Aug. 2010 | 106.2           |

### **Fitting the lognormal distribution to TP and Cu data (concentrations)**

Examples of fitting the lognormal distribution to concentrations of TP and Cu, for a large dataset for residential lands, are shown in Figures S1 and S2, respectively. The first case represented the best fit, the second case the worst fit. In the latter case, low  $R^2$  value of the fitted distribution was caused by outliers, identified in both examples. Outliers in the upper tail of the distribution are particularly important when assessing non-exceedance of high concentrations (e.g., when assessing compliance with water quality criteria), but less important when dealing with the central part of the distribution (e.g., choosing median concentrations for load estimates) as applied here.

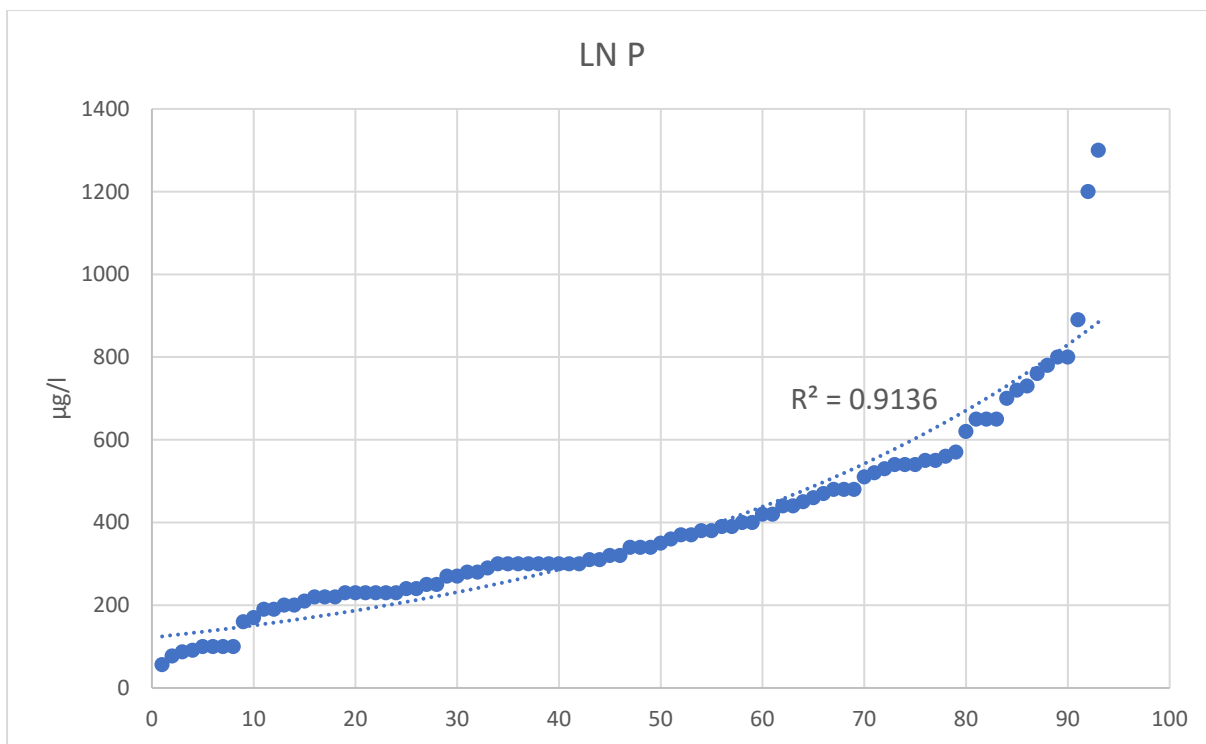

**Figure S1.** Lognormal distribution of phosphorus (TP) concentrations from the StormTac Database, for residential land use.

Figure S2. presents the lognormal distribution of copper (Cu) concentrations from the StormTac Database (residential land use). Among the four studied constituents, Cu had the worst fit ( $R^2=0,64$ ) to a lognormal function.

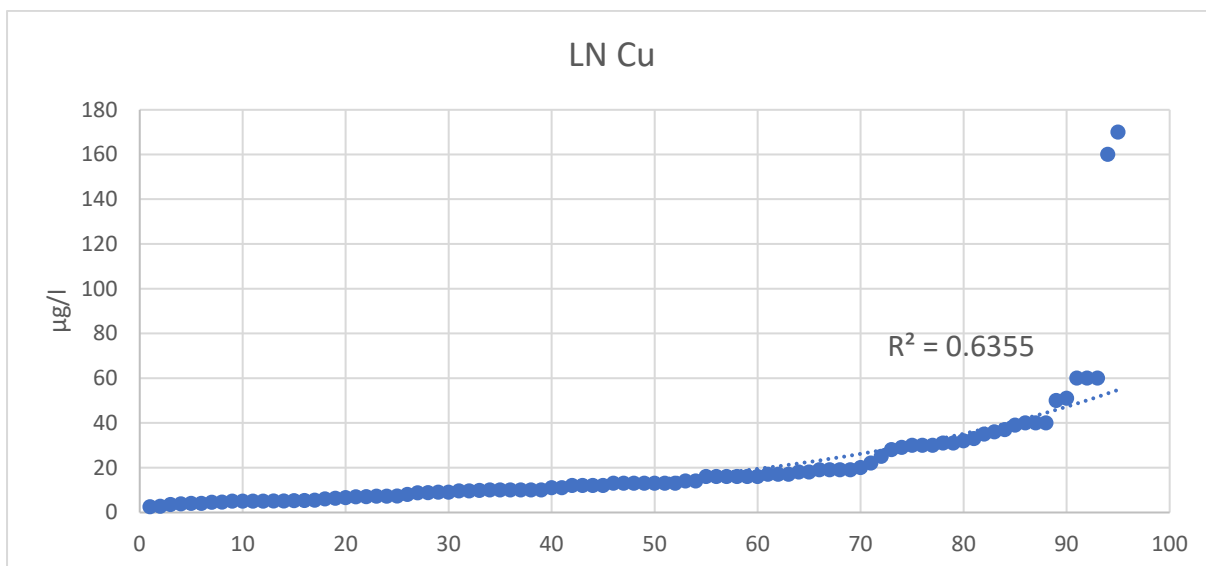

**Figure S2.** Lognormal distribution fitted to copper (Cu) concentrations from the StormTac Database (residential land use).
